# Supplementary material for: Anchoring a bow-shaped boron single chain in binary Be6B7− cluster: hybrid octagonal ring, multifold π/σ aromaticity, and dual electronic transmutation
Source: Royal Society of Chemistry journal article supplement (doi:10.1039/d0cp05012a), 2020-01-01
Supplement: d0cp05012a1.pdf [file d0cp05012a1.pdf]

## SUPPLEMENTARY INFORMATION

### Anchoring a bow-shaped boron single chain in binary $\text{Be}_6\text{B}_7^-$ cluster: hybrid octagonal ring, multifold $\pi/\sigma$ aromaticity, and dual electronic transmutation

Lin-Yan Feng, Kang Wang, and Hua-Jin Zhai\*

*Nanocluster Laboratory, Institute of Molecular Science, Shanxi University, Taiyuan 030006, China*

\*E-mail: hj.zhai@sxu.edu.cn

**Table S1** Cartesian coordinates for selected optimized structures of  $\text{Be}_6\text{B}_7^-$  cluster at the PBE0/6-311+G(d) level. (a) Global-minimum (GM)  $C_{2v}$  ( $^1A_1$ ) cluster. (b) Sandwich-type  $C_1$  ( $^1A$ ) structure. (c) Helix-type  $C_2$  ( $^1A$ ) structure.

**Figure S1** Selected optimized sandwich- and helix-type isomeric structures of  $\text{Be}_6\text{B}_7^-$  cluster at the PBE0/6-311+G(d) level along with their relative energies (in kcal  $\text{mol}^{-1}$ ) above the GM structure, including zero-point energy (ZPE) corrections. Also presented are energetics data at the PBE0-D3/6-311+G(d) (in *italics*, with ZPE corrections), B3LYP/6-311+G(d) (in curly brackets, with ZPE corrections), and single-point CCSD(T)/6-311+G(d)//PBE0/6-311+G(d) levels (in square brackets), respectively. These isomeric structures are higher in energy with respect to the low-lying structures shown in Figure 2 in the main text.

**Figure S1.** Selected optimized sandwich- and helix-type isomeric structures of  $\text{Be}_6\text{B}_7^-$  cluster at the PBE0/6-311+G(d) level along with their relative energies (in kcal  $\text{mol}^{-1}$ ) above the GM structure, including zero-point energy (ZPE) corrections. Also presented are energetics data at the PBE0-D3/6-311+G(d) (in *italics*, with ZPE corrections), B3LYP/6-311+G(d) (in curly brackets, with ZPE corrections), and single-point CCSD(T)/6-311+G(d)//PBE0/6-311+G(d) levels (in square brackets), respectively. These isomeric structures are higher in energy with respect to the low-lying structures shown in Figure 2 in the main text.

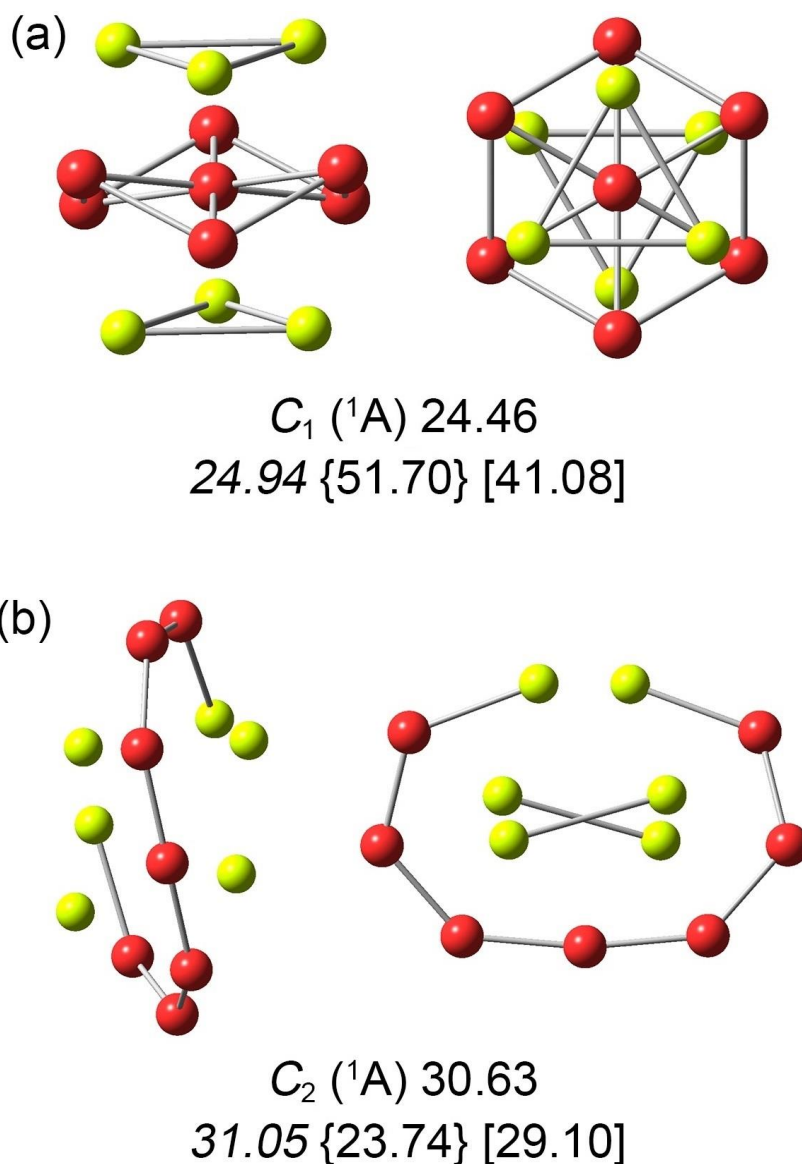

**Table S1.** Cartesian coordinates for selected optimized structures of  $\text{Be}_6\text{B}_7^-$  cluster at the PBE0/6-311+G(d) level. (a) Global-minimum (GM)  $C_{2v}$  ( $^1A_1$ ) cluster. (b) Sandwich-type  $C_1$  ( $^1A$ ) structure. (c) Helix-type  $C_2$  ( $^1A$ ) structure.

**(a) GM  $\text{Be}_6\text{B}_7^-$   $C_{2v}$  ( $^1A_1$ )**

|    |             |             |             |
|----|-------------|-------------|-------------|
| B  | 0.00000000  | 2.35737400  | 0.10635000  |
| B  | 0.00000000  | -1.55971000 | 1.44868100  |
| B  | 0.00000000  | 1.55571000  | -1.27108600 |
| B  | 0.00000000  | -2.35737400 | 0.10635000  |
| B  | 0.00000000  | 0.00000000  | 1.72074100  |
| B  | 0.00000000  | -1.55571000 | -1.27108600 |
| B  | 0.00000000  | 1.55971000  | 1.44868100  |
| Be | -0.98037100 | 0.00000000  | -1.66425700 |
| Be | -1.24860500 | -1.03347100 | 0.11693100  |
| Be | 1.24860500  | -1.03347100 | 0.11693100  |
| Be | 0.98037100  | 0.00000000  | -1.66425700 |
| Be | 1.24860500  | 1.03347100  | 0.11693100  |
| Be | -1.24860500 | 1.03347100  | 0.11693100  |

**(b) Sandwich-type  $C_1$  ( $^1A$ ) structure**

|   |             |             |             |
|---|-------------|-------------|-------------|
| B | -0.00030200 | -0.00001700 | -0.00362100 |
| B | -1.65887500 | 0.03030800  | 0.33698900  |
| B | 0.85949300  | 1.42095000  | 0.32729500  |
| B | 0.80488100  | -1.45466000 | 0.31792600  |
| B | -0.85982400 | -1.42192800 | -0.32639000 |
| B | 1.65947900  | -0.03025400 | -0.33547900 |

|    |             |             |             |
|----|-------------|-------------|-------------|
| B  | -0.80515900 | 1.45560000  | -0.31701800 |
| Be | -0.56123700 | 1.02657500  | 1.51164100  |
| Be | -0.59955700 | -1.01435900 | 1.50520900  |
| Be | 1.18641200  | -0.02728200 | 1.49860400  |
| Be | -1.18760400 | 0.02728300  | -1.49810600 |
| Be | 0.56203400  | -1.02697300 | -1.51168800 |
| Be | 0.60033400  | 1.01475800  | -1.50528800 |

**(c) Helix-type  $C_2$  ( $^1A$ ) structure**

|    |             |             |             |
|----|-------------|-------------|-------------|
| Be | 1.32849600  | 0.04551600  | -0.32083600 |
| Be | -1.32849600 | -0.04551600 | -0.32083600 |
| Be | 0.00000000  | 1.61001500  | 0.24741300  |
| Be | 0.00000000  | -1.61001500 | 0.24741300  |
| B  | 0.00000000  | 0.00000000  | 1.59528600  |
| Be | 0.06256500  | 1.05455300  | -1.73444100 |
| Be | -0.06256500 | -1.05455300 | -1.73444100 |
| B  | 1.28724800  | -0.87560100 | 1.45995800  |
| B  | -1.28724800 | 0.87560100  | 1.45995800  |
| B  | -1.92320100 | 1.71315600  | 0.30968100  |
| B  | 1.92320100  | -1.71315600 | 0.30968100  |
| B  | 1.37457800  | -1.87048800 | -1.12099100 |
| B  | -1.37457800 | 1.87048800  | -1.12099100 |
